# Supplementary material for: An Influenza A virus can evolve to use human ANP32E through altering polymerase dimerization
Source: PubMed Central journal article supplement (PMC10564888; doi:10.1038/s41467-023-41308-4), 2023-10-10

## Supplementary Information

**Supplemental Figure 1: Viral titres during experimental evolution.**

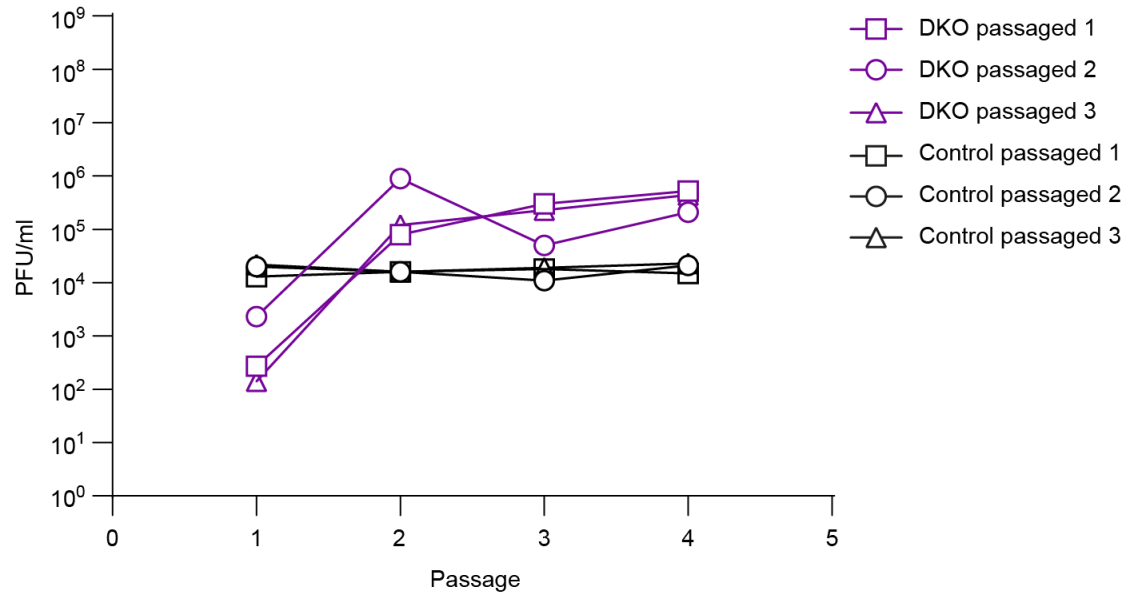

Three populations of Tky05 viruses were passaged on DKO and control cells respectively. Following each 72-hour passage, each population was grown on MDCK cells and the titre calculated, n=1 well. The titre was used to calculate the appropriate dilution for each population for subsequent passages. Source data are provided as a Source Data file.

**Supplemental Figure 2: Increased WT PB1 concentration does not increase polymerase activity in DKO cells.**

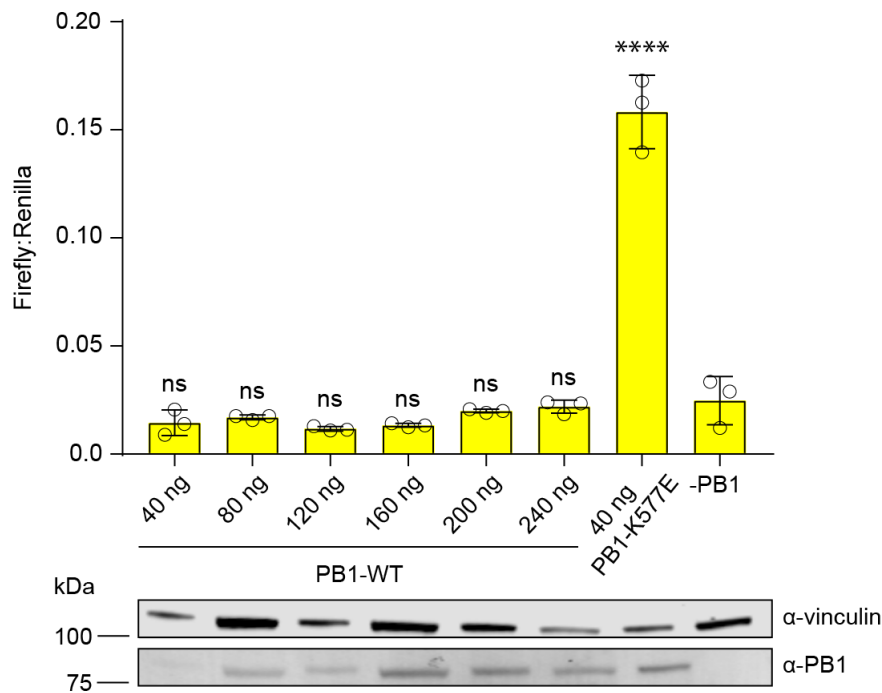

Minigenome assay performed in 24-well plates of eHAP DKO cells transfected with pCAGGS Tky05 PB2 (0.04  $\mu$ g), PB1 WT (0.04  $\mu$ g to 0.24  $\mu$ g) or K577E (0.04  $\mu$ g), PA (0.02  $\mu$ g), NP (0.08  $\mu$ g), reporter pPoll-luc (0.08  $\mu$ g) and control pCAGGS-*Renilla* luciferase (0.04  $\mu$ g). Data presented is representative of n=3 wells, statistical significance was determined by multiple comparisons of a one-way ANOVA, \* P<0.05, \*\* P<0.01, \*\*\* P<0.001, \*\*\*\*P<0.0001. Western blot showing expression of vinculin and PB1 from matched experiment conducted in DKO cells. Source data are provided as a Source Data file.

**Supplemental Figure 3: Partial sequence alignment of human, chicken and mouse ANP32 proteins.**

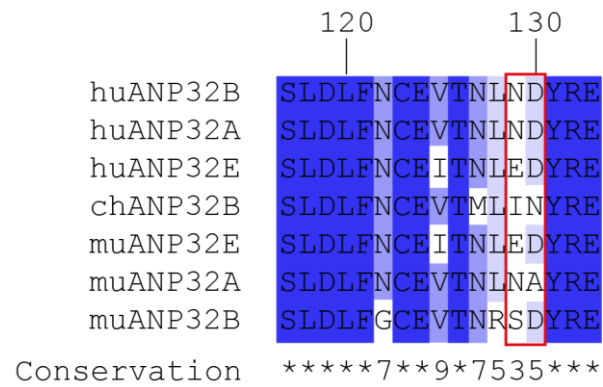

Sequence alignment comparing species variants of ANP32A, ANP32B and ANP32E proteins. Blue shading is representative of % identity. Generated using Clustal Omega and Jalview. Source data are provided as a Source Data file.

**Supplemental Figure 4: Gluc1 and Gluc2 fusions reduce polymerase activity similarly for WT and K577E polymerases.**

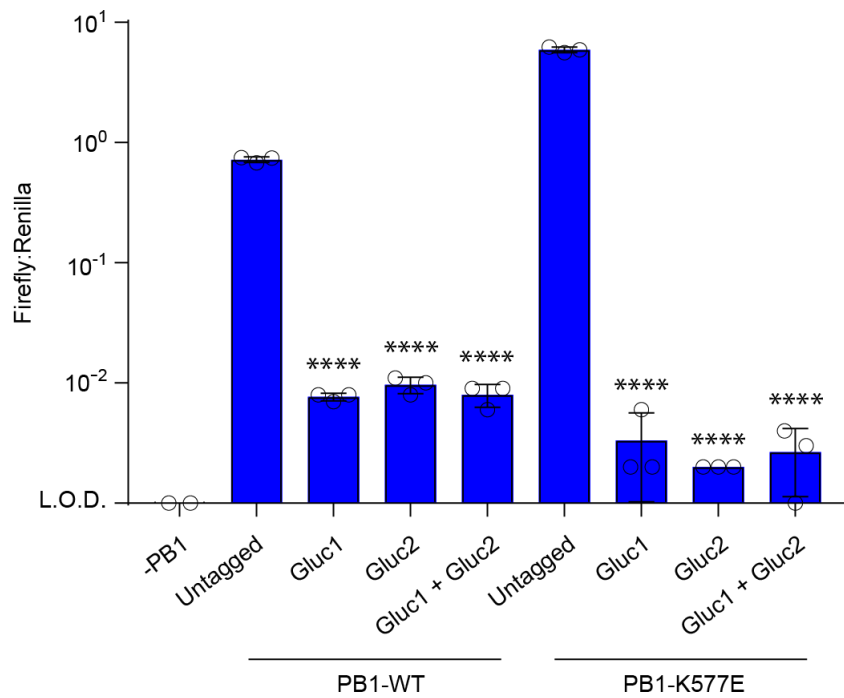

Minigenome assays comparing the effect of the Gluc1 and Gluc2 fusions on Tky05-WT and Tky05-PB1-K577E polymerase activity. Assays were conducted in TKO cells transfected with pCAGGS Tky05 PB2 (0.04  $\mu$ g), PB1 WT/PB1 WT-Gluc (0.04  $\mu$ g to 0.24  $\mu$ g) or K577E/K577E-Gluc (0.04  $\mu$ g), PA (0.02  $\mu$ g), NP (0.08  $\mu$ g), reporter pPoll-luc (0.08  $\mu$ g) and control pCAGGS-*Renilla* luciferase (0.04  $\mu$ g) supplemented with 0.04  $\mu$ g huANP32B-FLAG. Data presented is representative of n=3 wells, statistical significance was determined by multiple comparisons of a one-way ANOVA comparing PB1-WT to PB1-K577E, \* P<0.05, \*\* P<0.01, \*\*\* P<0.001, \*\*\*\*P<0.0001. Source data are provided as a Source Data file.

Raw images

Supplemental Figure 2

anti-PB1

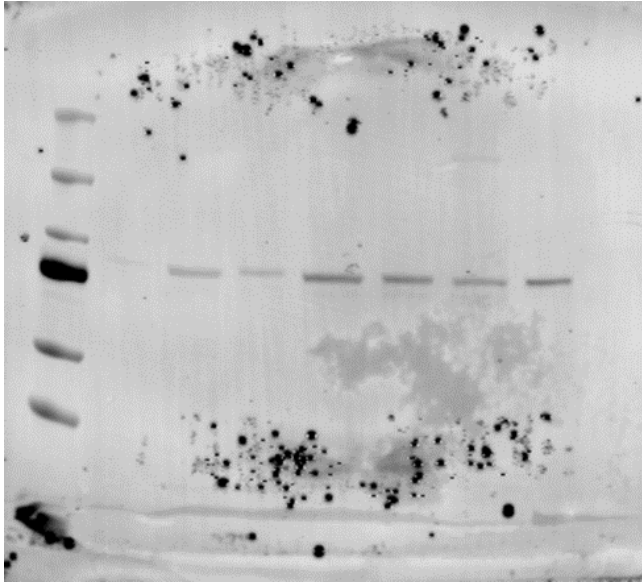

anti-vinculin

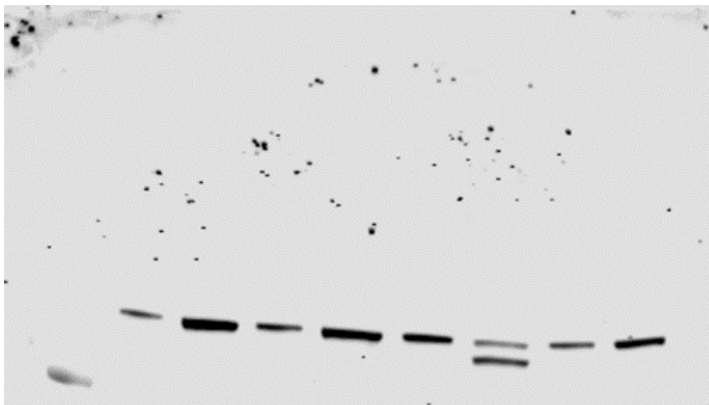

Supplement: 41467_2023_41308_MOESM1_ESM.pdf [file 41467_2023_41308_MOESM1_ESM.pdf]
